# Supplementary material
Source: Research Square preprint supplement (doi:10.21203/rs.3.rs-9071146/v1)
Supplement: Supplementary file 1 [file 370d77ce4a0b994a75e7adea.docx]

Table 1 Based on the baseline characteristics of participants with socioeconomic status (SES).

| Characteristicsa | Total population (n=5,993) | Low SES (n=1,559) | Medium SES (n=1,499) | High SES (n=2,935) | *P* valuesb |
| --- | --- | --- | --- | --- | --- |
| Age(years) | 50.92±17.21 | 60.09±15.97 | 41.95±14.87 | 50.64±16.46 | < 0.05 |
| 20-39 | 1,784(29.77) | 221(12.39) | 728(40.81) | 835(46.80) | < 0.05 |
| 40-59 | 2,015(33.62) | 372(18.46) | 521(25.86) | 1,122(55.68) |  |
| ≥60 | 2,194(36.61) | 966(44.03) | 250(11.39) | 978(44.58) |  |
| Sex |  |  |  |  | < 0.05 |
| Male | 2,977(49.67) | 682(22.91) | 830(27.88) | 1,465(49.21) |  |
| Female | 3,016(50.33) | 877(29.08) | 669(22.18) | 1,470(48.74) |  |
| BMI (kg/m2) | 30.16±7.51 | 30.73±7.99 | 30.05±7.75 | 29.92±7.09 | < 0.05 |
| Underweight | 73(1.22) | 24(32.88) | 26(35.62) | 23(31.51) |  |
| Normal | 1,413(23.58) | 325(23.00) | 388(27.46) | 700(49.54) |  |
| Overweight | 1,876(31.30) | 477(25.43) | 433(23.08) | 966(51.49) |  |
| Obese | 2,631(43.90) | 733(27.86) | 652(24.78) | 1,246(47.36) |  |
| Race/ethnicity |  |  |  |  | < 0.05 |
| Non–Hispanic White | 2,321(38.73) | 623(26.84) | 399(17.19) | 1,299(55.97) |  |
| Other | 3,672(61.27) | 936(25.49) | 1100(29.96) | 1,636(44.55) |  |
| PIR |  |  |  |  | < 0.05 |
| <1.0 | 1,099(18.34) | 554(50.41) | 545(49.59) | 0(0.00) |  |
| 1.0-4.0 | 3,170(52.90) | 971(30.63) | 947(29.87) | 1,252(39.50) |  |
| ≥4.0 | 1,724(28.77) | 34(1.97) | 7(0.41) | 1,683(97.62) |  |
| Education |  |  |  |  | < 0.05 |
| Less than high school | 932(15.55) | 475(50.97) | 408(43.78) | 49(5.26) |  |
| High school or equivalent | 1,465(24.45) | 589(40.20) | 432(29.49) | 444(30.31) |  |
| College or above | 3,596(60.00) | 495(13.77) | 659(18.33) | 2,442(67.91) |  |

Table 1 Based on the baseline characteristics of participants with socioeconomic status (SES). (continue)

| Characteristicsa | Total population (n=5,993) | Low SES (n=1,559) | Medium SES (n=1,499) | High SES (n=2,935) | *P* valuesb |
| --- | --- | --- | --- | --- | --- |
| Country of birth |  |  |  |  | < 0.05 |
| Born in US | 4,516 (75.35) | 1,223(27.08) | 1,063(23.54) | 2,230(49.38) |  |
| Born outside US | 1,477 (24.65) | 336(22.75) | 436(29.52) | 705(47.73) |  |
| Marital status |  |  |  |  | < 0.05 |
| With partner/spouse | 3,501(58.42) | 753(21.51) | 769(21.97) | 1,979(56.53) |  |
| Without partner/spouse | 2,492(41.58) | 806(32.34) | 730(29.29) | 956(38.36) |  |
| Occupation |  |  |  |  | < 0.05 |
| Unknown | 2,232(37.24) | 1,535(68.77) | 0(0.00) | 697(31.23) |  |
| Unemployed | 215(3.59) | 24(11.16) | 152(70.70) | 39(18.14) |  |
| Employed | 3,546(59.17) | 0(0.00) | 1,347(37.99) | 2,199(62.01) |  |
| Health insurance |  |  |  |  | < 0.05 |
| No health insurance | 915(15.27) | 202(22.08) | 653(71.37) | 60(6.56) |  |
| Public health insurance only | 1,927(32.15) | 1,047(54.33) | 648(33.63) | 232(12.04) |  |
| Private health insurance | 3,151(52.58) | 310(9.84) | 198(6.28) | 2,643(83.88) |  |
| No smoking | 3,416(57.00) | 719(21.05) | 786(23.01) | 1,911(55.94) | < 0.05 |
| No drinking | 2,712(45.25) | 594(21.90) | 571(21.05) | 1,547(57.04) | < 0.05 |
| Physical activity |  |  |  |  | < 0.05 |
| Low | 1,910(31.87) | 733(38.38) | 375(19.63) | 802(41.99) |  |
| Medium | 1,952(32.57) | 521(26.69) | 361(18.49) | 1,070(54.82) |  |
| High | 2,131(35.56) | 305(14.31) | 763(35.80) | 1,063(49.88) |  |
| HEI score | 50.94±14.65 | 52.82±14.86 | 48.31±13.73 | 48.93±14.47 | < 0.05 |
| Low | 2,284(38.11) | 610(26.71) | 698(30.56) | 976(42.73) |  |
| Medium | 1,207(20.14) | 318(26.35) | 325(26.93) | 564(46.73) |  |
| High | 2,502(41.75) | 631(25.22) | 476(19.02) | 1,395(55.76) |  |

Table 1 Based on the baseline characteristics of participants with socioeconomic status (SES). (continue)

| Characteristicsa | Total population (n=5,993) | Low SES (n=1,559) | Medium SES (n=1,499) | High SES (n=2,935) | *P* valuesb |
| --- | --- | --- | --- | --- | --- |
| Cultural adaptation score | 4.30±1.30 | 4.36±1.26 | 4.05±1.51 | 4.41±1.19 | 0.37 |
| Family Language Rating | 1.64±0.73 | 1.64±0.75 | 1.48±0.85 | 1.73±0.65 | < 0.05 |
| Healthy lifestyle |  |  |  |  | < 0.05 |
| 0-1 | 2,346(39.15) | 821(35.00) | 647(27.58) | 878(37.43) |  |
| 2 | 2,115(35.29) | 511(24.16) | 510(24.11) | 1094(51.73) |  |
| 3-4 | 1,532(25.56) | 227(14.82) | 342(22.32) | 963(62.86) |  |
| Disease |  |  |  |  |  |
| Hypertension | 2,674(44.62) | 990(37.02) | 463(17.31) | 1221(45.66) | < 0.05 |
| Diabetes | 1,240(20.69) | 513(41.37) | 205(16.53) | 522(42.10) | < 0.05 |
| CVD | 559(9.33) | 287(51.34) | 72(12.88) | 200(35.78) | < 0.05 |
| Stroke | 290(4.84) | 177(61.03) | 32(11.03) | 81(27.93) | < 0.05 |
| COPD | 569(9.49) | 292(51.32) | 108(18.98) | 169(29.70) | < 0.05 |
| CKD | 767(12.80) | 340(44.33) | 113(14.73) | 314(40.94) | 0.31 |
| OSAHS | 73(1.22) | 30(41.10) | 19(26.03) | 24(32.88) | < 0.05 |

*Abbreviation:* BMI: Body Mass Index; CKD: Chronic Kidney Disease; COPD: Chronic Obstructive Pulmonary Disease; CVD: Cardiovascular Disease; PIR:Poverty index ratio; OSAHS: Obstructive Sleep Apnea-Hypopnea Syndrome; SES: Socioeconomic Status; US:the United States.

a Data expressed as mean ± standard deviation or number (percentage)

b Compared using Kruskal–Wallis, ANOVA, Mann–Whitney U-test, or t-test for continuous variables and Chi-square tests for categorical variables

Table 2 Multi level logistic regression analysis of hypertension and socioeconomic status.

|  | Model 1 | | Model 2 | | Model 3 | | Model 4 | |
| --- | --- | --- | --- | --- | --- | --- | --- | --- |
| *OR (95 % CI)* | *P*-value | *OR (95 % CI)* | *P*-value | *OR (95 % CI)* | *P*-value | *OR (95 % CI)* | *P*-value |
| SES levels | | | | | | | | |
| Low | Reference | - | Reference | - | Reference | - | Reference | - |
| Middle | 0.257(0.221,0.298) | < 0.05 | 0.632(0.531,0.753) | < 0.05 | 0.640(0.535,0.766) | < 0.05 | 0.715(0.595,0.858) | < 0.05 |
| High | 0.409(0.361,0.465) | < 0.05 | 0.626(0.542,0.722) | < 0.05 | 0.690(0.594,0.801) | < 0.05 | 0.793(0.668,0.941) | 0.38 |

*Abbreviation:* OR, Odds Ratio; CI, Confidence Intervals; SES: Socioeconomic Status.

Model 1: Unadjusted model;

Model 2: Adjusted for age, sex;

Model 3: Further adjusts for race, marital status, BMI, and cultural adaptation scores based on Model 2;

Model 4: Further adjusted for Diabetes, CVD, Stroke, COPD, CKD, OSAHS, Education based on Model 3.

*P* < 0.05.

Table 3 Association between Socioeconomic Status and Healthy Lifestyle Score: multinomial logistic regression results.

| Category  (SES) | Category  (Healthy Lifestyle Score) | Model 1 | | Model 2 | | Model 3 | | Model 4 | |
| --- | --- | --- | --- | --- | --- | --- | --- | --- | --- |
| *OR (95 % CI)* | *P*-value | *OR (95 % CI)* | *P*-value | *OR (95 % CI)* | *P*-value | *OR (95 % CI)* | *P*-value |
| Medium vs Low SES | Score=2 vs Ref. Score=0-1 | 1.270(1.079,1.487) | < 0.05 | 1.180(0.989,1.400) | 0.07 | 1.150(0.967,1.373) | 0.1143 | 1.065(0.891,1.273) | 0.49 |
| Medium vs Low SES | Score=3-4 vs Ref. Score=0-1 | 1.912(1.570,2.328) | < 0.05 | 1.672(1.354,2.066) | < 0.05 | 1.590(1.285,1.968) | <0.0001 | 1.557(1.316,1.843) | < 0.05 |
| High vs Low SES | Score=2 vs Ref. Score=0-1 | 2.002(1.737,2.307) | < 0.05 | 1.931(1.669,2.235) | < 0.05 | 1.926(1.660,2.235) | <0.0001 | 1.557(1.316,1.843) | < 0.05 |
| High vs Low SES | Score=3-4 vs Ref. Score=0-1 | 3.967(3.336,4.717) | < 0.05 | 3.707(3.105,4.427) | < 0.05 | 3.696(3.083,4.432) | <0.0001 | 2.595(2.121,3.174) | < 0.05 |

*Abbreviation:* OR, Odds Ratio; CI, Confidence Intervals; SES: Socioeconomic Status.

Model 1: Unadjusted model;

Model 2: Adjusted for age, sex;

Model 3: Further adjusts for race, marital status, BMI, and cultural adaptation scores based on Model 2;

Model 4: Further adjusted for Diabetes, CVD, Stroke, COPD, CKD, OSAHS, Education based on Model 3.

*P* < 0.05.

Table 4 Logistic Regression of Healthy Lifestyle Groups on Hypertension Risk.

| Category  (Healthy Lifestyle Groups) | Model 1 | | Model 2 | | Model 3 | | Model 4 | |
| --- | --- | --- | --- | --- | --- | --- | --- | --- |
| *OR (95 % CI)* | *P*-value | *OR (95 % CI)* | *P*-value | *OR (95 % CI)* | *P*-value | *OR (95 % CI)* | *P*-value |
| Medium vs Low SES | 0.738 (0.655,0.830) | < 0.05 | 0.798 (0.696,0.915) | 0.33 | 0.770 (0.669,0.886) | 0.08 | 0.782 (0.678,0.902) | 0.07 |
| High vs Low SES | 0.614 (0.539,0.700) | < 0.05 | 0.720 (0.619,0.838) | < 0.05 | 0.746 (0.638,0.873) | < 0.05 | 0.775 (0.661,0.909) | 0.07 |

*Abbreviation:* OR, Odds Ratio; CI, Confidence Intervals; SES: Socioeconomic Status.

Model 1: Unadjusted model;

Model 2: Adjusted for age, sex;

Model 3: Further adjusts for race, marital status, BMI, and cultural adaptation scores based on Model 2;

Model 4: Further adjusted for Diabetes, CVD, Stroke, COPD, CKD, OSAHS, Education based on Model 3.

*P* < 0.05.

Table 5 Bootstrap Mediation Analysis Results.

| Mean a path  (SES → Mediator) | Mean b path  (Mediator → Outcome) | Mean Indirect Effect  (a*b) | Mean Total Effect  (c) | Mean Direct Effect  (c') | 95% CI Lower  (Indirect) | 95% CI Upper  (Indirect) |
| --- | --- | --- | --- | --- | --- | --- |
| 0.33855 | -0.24256 | -0.082034 | -0.33643 | -0.25440 | -0.14518 | -0.034350 |

Note:Mediator = Lifestyle; Outcome = Hypertension.

Table 6 Bootstrap SEM Analysis Results.

| Path Indicator | Mean Estimate | Lower Confidence Limit (Lower CL) | 95% CI Lower Limit (Indirect) | Upper Confidence Limit (Upper CL) | 95% CI Upper Limit (Indirect) |
| --- | --- | --- | --- | --- | --- |
| Mean a path (SES → Mediator) | 0.20724 | 0.20667 | - | 0.20781 | - |
| Mean b path (Mediator → Outcome) | -0.041809 | -0.042195 | - | -0.041422 | - |
| Mean Direct Effect (c') | -0.083053 | -0.083422 | - | -0.082684 | - |
| Mean Indirect Effect (a*b) | -0.008660197 | -0.008742116 | -0.008742116 | -0.008578278 | -0.008578278 |
| Mean Total Effect (c) | -0.091713 | -0.092072 | - | -0.091355 | - |

Note:Mediator = Lifestyle; Outcome = Hypertension.

Table 7 Adjusted ORs and 95%CIs for Hypertension by SES Categories Across Subgroups.

| Subgroup Variable | Subgroup Level | SES Category | Adjusted OR (95% CI) | *P*-value | SES Category | Adjusted OR (95% CI) | *P*-value |
| --- | --- | --- | --- | --- | --- | --- | --- |
| Age Group | 20-39 years | Middle SES | 1.24 (0.77,2.00) | 0.38 | High SES | 1.11 (0.67,1.83) | 0.68 |
|  | 40-59 years | Middle SES | 0.57 (0.42,0.77) | < 0.05 | High SES | 0.63 (0.47,0.85) | < 0.05 |
|  | 60+ years | Middle SES | 0.60 (0.44,0.83) | < 0.05 | High SES | 0.83 (0.65,1.07) | 0.14 |
| Gender | Male | Middle SES | 0.58 (0.45,0.76) | < 0.05 | High SES | 0.65 (0.51,0.84) | < 0.05 |
|  | Female | Middle SES | 0.88 (0.67,1.15) | 0.34 | High SES | 0.89 (0.70,1.14) | 0.36 |
| Race | Non-Hispanic-White | Middle SES | 0.70 (0.56,0.88) | < 0.05 | High SES | 0.774 (0.62,0.97) | < 0.05 |
|  | Other | Middle SES | 0.70 (0.56,0.88) | < 0.05 | High SES | 0.77 (0.62,0.97) | < 0.05 |
| Marital Status | Without partner/spouse | Middle SES | 0.59 (0.45,0.76) | < 0.05 | High SES | 0.65 (0.50,0.84) | < 0.05 |
|  | With partner/spouse | Middle SES | 0.88 (0.68,1.14) | 0.34 | High SES | 0.95 (0.76,1.20) | 0.69 |
| BMI Category | Underweight | Middle SES | 1.22 (0.12,12.61) | 0.87 | High SES | 0.45 (0.06,3.64) | 0.46 |
|  | Normal | Middle SES | 0.78 (0.51,1.18) | 0.23 | High SES | 0.55 (0.38,0.82) | < 0.05 |
|  | Overweight | Middle SES | 0.70 (0.50,0.97) | < 0.05 | High SES | 0.84 (0.61,1.14) | 0.26 |
|  | Obese | Middle SES | 0.73 (0.56,0.95) | < 0.05 | High SES | 0.92 (0.72,1.18) | 0.52 |

*Abbreviation:* OR, Odds Ratio; CI, Confidence Intervals; SES: Socioeconomic Status.

Adjusted Model: Adjusted for age, sex, SES, Race, marital status, BMI, Diabetes, CVD, Stroke, COPD, CKD, OSAHS, Education.
