# Supplementary material
Source: Research Square preprint supplement (doi:10.21203/rs.3.rs-9071146/v1)
Supplement: Supplementary file 2 [file 765ac6871b33bb712234ced7.docx]

Supplementary Tables 1 Multivariable Linear Regression of SES on HEI2015 Total Score.

| Category  (SES) | Model 1 | | Model 2 | | Model 3 | | Model 4 | |
| --- | --- | --- | --- | --- | --- | --- | --- | --- |
| Estimate (SE) | *P*-value | Estimate (SE) | *P*-value | Estimate (SE) | *P*-value | Estimate (SE) | *P*-value |
| Low vs High SES | -2.917 (0.454) | <0.0001 | -4.283 (0.463) | <0.0001 | -3.991 (0.466) | <0.0001 | -2.270 (0.523) | <0.0001 |
| Medium vs High SES | -5.401 (0.460) | <0.0001 | -4.149 (0.466) | <0.0001 | -4.201 (0.468) | <0.0001 | -3.144 (0.501) | <0.0001 |

*Abbreviation:* SE, Standard Error; SES: Socioeconomic Status.

Model 1: Unadjusted model;

Model 2: Adjusted for age, sex;

Model 3: Further adjusts for race, marital status, BMI, and cultural adaptation scores based on Model 2;

Model 4: Further adjusted for Diabetes, CVD, Stroke, COPD, CKD, OSAHS, Education based on Model 3.

*P* < 0.05.

Supplementary Tables 2 Least Squares Means (LSMeans) of HEI2015 Total Score by SES Group.

| Category  (SES) | Model 1 | Model 2 | Model 3 | Model 4 |
| --- | --- | --- | --- | --- |
| LSMean (*95% CI*) | LSMean (*95% CI*) | LSMean (*95% CI*) | LSMean (*95% CI*) |
| Low | 50.130 (49.411, 50.849) | 48.801 (48.059, 49.544) | 48.353 (47.291, 49.416) | 47.048 (45.800 , 48.295) |
| Medium | 47.646 (46.913, 48.379) | 48.935 (48.180, 49.689) | 48.143 (47.058, 49.229) | 46.174 (44.829 , 47.519) |
| High | 53.047 (52.523, 53.571) | 53.084 (52.566, 53.602) | 52.344 (51.388, 53.300) | 49.318 (47.976 , 50.660) |

*Abbreviation:* LSMean, Least Squares Means; SES: Socioeconomic Status.

Model 1: Unadjusted model;

Model 2: Adjusted for age, sex;

Model 3: Further adjusts for race, marital status, BMI, and cultural adaptation scores based on Model 2;

Model 4: Further adjusted for Diabetes, CVD, Stroke, COPD, CKD, OSAHS, Education based on Model 3.

*P* < 0.05.

Supplementary Tables 3 Multinomial Logistic Regression of SES on Physical Activity Level.

| Category  (SES) | Category  (Physical Activity Level) | Model 1 | | Model 2 | | Model 3 | | Model 4 | |
| --- | --- | --- | --- | --- | --- | --- | --- | --- | --- |
| OR (95% CI) | *P*-value | OR (95% CI) | *P*-value | OR (95% CI) | *P*-value | OR (95% CI) | *P*-value |
| Medium vs Low SES | Middle vs Low | 1.354(1.128,1.626) | 0.0012 | 1.051(0.864,1.278) | 0.6195 | 1.058(0.869,1.288) | 0.5742 | 0.983(0.805,1.201) | 0.8681 |
| Medium vs Low SES | High vs Low | 4.890(4.076,5.866) | <0.0001 | 2.682(2.201,3.268) | <0.0001 | 2.719(2.230,3.316) | <0.0001 | 2.522(2.060,3.087) | <0.0001 |
| High vs Low SES | Middle vs Low | 1.877(1.624,2.170) | <0.0001 | 1.665(1.434,1.932) | <0.0001 | 1.621(1.393,1.887) | <0.0001 | 1.147(0.962,1.366) | 0.1257 |
| High vs Low SES | High vs Low | 3.185(2.709,3.746) | <0.0001 | 2.354(1.987,2.788) | <0.0001 | 2.273(1.914,2.700) | <0.0001 | 1.744(1.436,2.117) | <0.0001 |

*Abbreviation:* OR, Odds Ratio; CI, Confidence Intervals; SES: Socioeconomic Status.

Model 1: Unadjusted model;

Model 2: Adjusted for age, sex;

Model 3: Further adjusts for race, marital status, BMI, and cultural adaptation scores based on Model 2;

Model 4: Further adjusted for Diabetes, CVD, Stroke, COPD, CKD, OSAHS, Education based on Model 3.

*P* < 0.05.

Supplementary Tables 4 Logistic Regression of SES on Smoking Status.

| Category  (SES) | Model 1 | | Model 2 | | Model 3 | | Model 4 | |
| --- | --- | --- | --- | --- | --- | --- | --- | --- |
| OR (95% CI) | *P*-value | OR (95% CI) | *P*-value | OR (95% CI) | *P*-value | OR (95% CI) | *P*-value |
| Medium vs Low SES | 0.776 (0.674,0.895) | 0.0005 | 0.943 (0.805,1.105) | <0.0001 | 0.985 (0.839,1.156) | <0.0001 | 1.077 (0.914,1.271) | 0.3745 |
| High vs Low SES | 0.459 (0.405,0.520) | <0.0001 | 0.491 (0.430,0.561) | <0.0001 | 0.481 (0.420,0.551) | <0.0001 | 0.612 (0.524,0.715) | <0.0001 |

*Abbreviation:* OR, Odds Ratio; CI, Confidence Intervals; SES: Socioeconomic Status.

Model 1: Unadjusted model;

Model 2: Adjusted for age, sex;

Model 3: Further adjusts for race, marital status, BMI, and cultural adaptation scores based on Model 2;

Model 4: Further adjusted for Diabetes, CVD, Stroke, COPD, CKD, OSAHS, Education based on Model 3.

*P* < 0.05.

Supplementary Tables 5 Logistic Regression of SES on Alcohol Status.

| Category  (SES) | Model 1 | | Model 2 | | Model 3 | | Model 4 | |
| --- | --- | --- | --- | --- | --- | --- | --- | --- |
| OR (95% CI) | *P*-value | OR (95% CI) | *P*-value | OR (95% CI) | *P*-value | OR (95% CI) | *P*-value |
| Medium vs Low SES | 1.000 (0.864,1.158) | 0.9958 | 0.849 (0.724,0.995) | 0.0070 | 0.869 (0.740,1.020) | 0.0031 | 0.914 (0.777,1.075) | 0.0259 |
| High vs Low SES | 0.552 (0.4870.626) | <0.0001 | 0.504 (0.442,0.574) | <0.0001 | 0.508 (0.445,0.581) | <0.0001 | 0.616 (0.530,0.716) | <0.0001 |

*Abbreviation:* OR, Odds Ratio; CI, Confidence Intervals; SES: Socioeconomic Status.

Model 1: Unadjusted model;

Model 2: Adjusted for age, sex;

Model 3: Further adjusts for race, marital status, BMI, and cultural adaptation scores based on Model 2;

Model 4: Further adjusted for Diabetes, CVD, Stroke, COPD, CKD, OSAHS, Education based on Model 3.

*P* < 0.05.


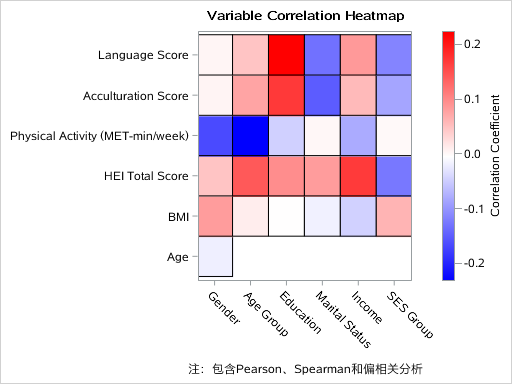


Supplementary Figure 1 Heatmap of correlations between sociodemographic characteristics, behavioral indicators, and health variables.
