# Supplementary material
Source: Research Square preprint supplement (doi:10.21203/rs.3.rs-9071146/v1)
Supplement: Supplementary file 3 [file 8f6a2d646155c0e5caea81d6.docx]

**Summary Table**

| What is known about the topic? | Hypertension is a prevalent global health issue strongly influenced by socioeconomic status (SES) and lifestyle behaviors.  Lower SES is associated with higher hypertension risk due to adverse living conditions and unhealthy behaviors.  Healthy lifestyle factors such as balanced diet, physical activity, non-smoking, and moderate alcohol intake reduce hypertension risk. |
| --- | --- |
| What this study adds? | Higher SES is linked to lower hypertension risk partly through healthier lifestyle behaviors, which mediate about 24% of the SES-hypertension association.  The study uses nationally representative data and latent class analysis to comprehensively assess SES and its relationship with lifestyle and hypertension.  Public health interventions should combine lifestyle promotion with socioeconomic improvements, tailored to sociodemographic differences, to reduce hypertension disparities. |
